# Supplementary material for: Dehydration, Wellness, and Training Demands of Professional Soccer Players during Preseason
Source: Hindawi journal article supplement (doi:10.1155/2022/8054449), 2022-01-01
Supplement: f1 [file 8054449.f1.pdf]

| UC   | Microcycle |
|------|------------|
| 2/92 | 1/00       |
| 4/08 | 1/00       |
| 3/29 | 1/00       |
| 2/85 | 1/00       |
|      | 1/00       |
| 2/06 | 1/00       |
| 3/56 | 1/00       |
|      | 1/00       |
| 3/02 | 1/00       |
| 2/90 | 1/00       |
| 2/12 | 1/00       |
| 5/80 | 1/00       |
| 4/00 | 1/00       |
| 3/08 | 1/00       |
|      | 1/00       |
| 3/00 | 1/00       |
| 4/20 | 1/00       |
|      | 1/00       |
| 2/00 | 1/00       |
| 3/12 | 1/00       |
| 3/00 | 1/00       |
| 4/00 | 1/00       |
|      | 1/00       |
|      | 1/00       |
|      | 1/00       |
| 3/00 | 1/00       |
|      | 1/00       |
|      | 1/00       |
| 2/94 | 2/00       |
| 4/18 | 2/00       |
| 3/37 | 2/00       |
| 3/53 | 2/00       |
|      | 2/00       |
| 1/95 | 2/00       |
| 3/25 | 2/00       |
| 3/35 | 2/00       |
| 3/29 | 2/00       |
| 2/99 | 2/00       |
| 2/10 | 2/00       |
| 5/00 | 2/00       |
|      | 2/00       |
| 3/15 | 2/00       |
| 3/95 | 2/00       |
| 3/04 | 2/00       |
| 2/63 | 2/00       |
| 3/96 | 2/00       |

| M1 | M2          | M3          |             |
|----|-------------|-------------|-------------|
|    | <b>3/26</b> | <b>3/22</b> | <b>3/22</b> |
|    | <b>0/89</b> | <b>0/76</b> | <b>1/09</b> |

Kruskal-Wallis ANOVA by Independent (group)  
Kruskal-Wallis test: H ( 3, 1

|   | Code | Valid |
|---|------|-------|
| 1 | 1    | 19    |
| 2 | 2    | 25    |
| 3 | 3    | 24    |
| 4 | 4    | 24    |

|      |      |
|------|------|
| 2/00 | 2/00 |
| 3/06 | 2/00 |
| 3/05 | 2/00 |
| 4/00 | 2/00 |
| 2/25 | 2/00 |
| 3/07 | 2/00 |
| 4/54 | 2/00 |
| 2/78 | 2/00 |
|      | 2/00 |
| 3/06 | 2/00 |
| 2/96 | 3/00 |
| 4/15 | 3/00 |
|      | 3/00 |
| 3/79 | 3/00 |
| 2/50 | 3/00 |
| 1/84 | 3/00 |
| 3/00 | 3/00 |
| 2/96 | 3/00 |
| 3/22 | 3/00 |
| 2/56 | 3/00 |
| 2/13 | 3/00 |
|      | 3/00 |
|      | 3/00 |
| 3/38 | 3/00 |
| 4/27 | 3/00 |
| 3/06 | 3/00 |
| 2/45 | 3/00 |
| 4/00 | 3/00 |
| 2/00 | 3/00 |
| 3/08 | 3/00 |
| 3/00 | 3/00 |
| 6/94 | 3/00 |
| 2/50 | 3/00 |
| 3/00 | 3/00 |
| 5/00 | 3/00 |
| 2/58 | 3/00 |
|      | 3/00 |
| 3/00 | 3/00 |
| 3/00 | 4/00 |
| 3/41 | 4/00 |
|      | 4/00 |
| 4/02 | 4/00 |
| 2/00 | 4/00 |
| 1/75 | 4/00 |
|      | 4/00 |
| 3/11 | 4/00 |
| 3/00 | 4/00 |

|      |      |
|------|------|
| 3/00 | 4/00 |
| 2/39 | 4/00 |
|      | 4/00 |
|      | 4/00 |
| 3/22 | 4/00 |
| 4/25 | 4/00 |
| 3/00 | 4/00 |
| 2/58 | 4/00 |
| 4/00 | 4/00 |
| 2/00 | 4/00 |
| 3/40 | 4/00 |
| 3/00 | 4/00 |
| 4/00 | 4/00 |
| 2/25 | 4/00 |
| 3/00 | 4/00 |
| 4/75 | 4/00 |
| 2/75 | 4/00 |
| 3/33 | 4/00 |
| 3/00 | 4/00 |

**M4**  
**3/09**  
**0/74**

Ranks; Var1 (Spreadsheet1)  
 (ing) variable: Var2  
 N= 92) =,8039039 p =,8485

| Sum of   | Mean     |
|----------|----------|
| 915/000  | 48/15789 |
| 1242/000 | 49/68000 |
| 1050/000 | 43/75000 |
| 1071/000 | 44/62500 |

| SW    | Microcycle |
|-------|------------|
| 67/53 | 1/00       |
| 83/58 | 1/00       |
| 64/93 | 1/00       |
| 85/00 | 1/00       |
|       | 1/00       |
| 94/09 | 1/00       |
| 66/00 | 1/00       |
|       | 1/00       |
| 79/63 | 1/00       |
| 78/47 | 1/00       |
| 84/94 | 1/00       |
| 77/72 | 1/00       |
| 92/29 | 1/00       |
| 79/98 | 1/00       |
|       | 1/00       |
| 72/72 | 1/00       |
| 69/51 | 1/00       |
|       | 1/00       |
| 82/16 | 1/00       |
| 78/57 | 1/00       |
| 69/00 | 1/00       |
| 76/37 | 1/00       |
|       | 1/00       |
|       | 1/00       |
|       | 1/00       |
| 72/95 | 1/00       |
|       | 1/00       |
|       | 1/00       |
| 67/16 | 2/00       |
| 83/75 | 2/00       |
| 64/50 | 2/00       |
| 85/07 | 2/00       |
|       | 2/00       |
| 93/40 | 2/00       |
| 66/13 | 2/00       |
| 95/63 | 2/00       |
| 77/56 | 2/00       |
| 80/06 | 2/00       |
| 84/90 | 2/00       |
| 77/54 | 2/00       |
|       | 2/00       |
| 80/31 | 2/00       |
| 72/90 | 2/00       |
| 72/00 | 2/00       |
| 69/31 | 2/00       |
| 69/44 | 2/00       |

|              |      |
|--------------|------|
| <b>82/04</b> | 2/00 |
| <b>79/35</b> | 2/00 |
| <b>69/00</b> | 2/00 |
| <b>76/48</b> | 2/00 |
| <b>72/35</b> | 2/00 |
| <b>75/59</b> | 2/00 |
| <b>68/86</b> | 2/00 |
| <b>72/35</b> | 2/00 |
|              | 2/00 |
| <b>70/12</b> | 2/00 |
| <b>67/43</b> | 3/00 |
| <b>83/18</b> | 3/00 |
|              | 3/00 |
| <b>84/96</b> | 3/00 |
| <b>83/00</b> | 3/00 |
| <b>92/79</b> | 3/00 |
| <b>67/00</b> | 3/00 |
| <b>95/65</b> | 3/00 |
| <b>78/33</b> | 3/00 |
| <b>80/65</b> | 3/00 |
| <b>84/92</b> | 3/00 |
|              | 3/00 |
|              | 3/00 |
| <b>80/35</b> | 3/00 |
| <b>70/00</b> | 3/00 |
| <b>72/00</b> | 3/00 |
| <b>69/45</b> | 3/00 |
| <b>69/43</b> | 3/00 |
| <b>82/25</b> | 3/00 |
| <b>79/96</b> | 3/00 |
| <b>69/00</b> | 3/00 |
| <b>78/17</b> | 3/00 |
| <b>72/25</b> | 3/00 |
| <b>75/97</b> | 3/00 |
| <b>68/40</b> | 3/00 |
| <b>71/46</b> | 3/00 |
|              | 3/00 |
| <b>70/17</b> | 3/00 |
| <b>67/45</b> | 4/00 |
| <b>83/97</b> | 4/00 |
|              | 4/00 |
| <b>84/98</b> | 4/00 |
| <b>83/00</b> | 4/00 |
| <b>92/35</b> | 4/00 |
|              | 4/00 |
| <b>96/57</b> | 4/00 |
| <b>79/00</b> | 4/00 |

|              |      |
|--------------|------|
| <b>81/84</b> | 4/00 |
| <b>86/10</b> | 4/00 |
|              | 4/00 |
|              | 4/00 |
| <b>79/87</b> | 4/00 |
| <b>72/93</b> | 4/00 |
| <b>72/10</b> | 4/00 |
| <b>69/77</b> | 4/00 |
| <b>69/30</b> | 4/00 |
| <b>82/15</b> | 4/00 |
| <b>79/38</b> | 4/00 |
| <b>69/00</b> | 4/00 |
| <b>77/05</b> | 4/00 |
| <b>72/59</b> | 4/00 |
| <b>76/00</b> | 4/00 |
| <b>69/08</b> | 4/00 |
| <b>72/33</b> | 4/00 |
| <b>89/08</b> | 4/00 |
| <b>70/05</b> | 4/00 |

| M1    | M2    | M3    | M4    |
|-------|-------|-------|-------|
| 77/66 | 76/23 | 76/95 | 78/16 |
| 8/32  | 8/11  | 8/02  | 8/05  |

Kruskal-Wallis ANOVA by Ranks; Var1 (Spreadsheet1)  
 Independent (grouping) variable: Var2  
 Kruskal-Wallis test:  $H(3, N=92) = 1,005591$   $p = ,7999$

|   | Code | Valid | Sum of   | Mean     |
|---|------|-------|----------|----------|
| 1 | 1    | 19    | 915/500  | 48/18421 |
| 2 | 2    | 25    | 1071/000 | 42/84000 |
| 3 | 3    | 24    | 1090/500 | 45/43750 |
| 4 | 4    | 24    | 1201/000 | 50/04167 |







| FW    | Microcycle |
|-------|------------|
| 66/58 | 1/00       |
| 83/74 | 1/00       |
| 64/00 | 1/00       |
| 84/63 | 1/00       |
|       | 1/00       |
| 93/23 | 1/00       |
| 66/00 | 1/00       |
|       | 1/00       |
| 79/16 | 1/00       |
| 78/64 | 1/00       |
| 84/83 | 1/00       |
| 77/14 | 1/00       |
| 92/02 | 1/00       |
| 78/96 | 1/00       |
|       | 1/00       |
| 72/44 | 1/00       |
| 68/60 | 1/00       |
|       | 1/00       |
| 81/47 | 1/00       |
| 77/00 | 1/00       |
| 69/00 | 1/00       |
| 75/85 | 1/00       |
|       | 1/00       |
|       | 1/00       |
|       | 1/00       |
| 71/75 | 1/00       |
|       | 1/00       |
|       | 1/00       |
| 66/48 | 2/00       |
| 83/49 | 2/00       |
| 64/47 | 2/00       |
| 84/78 | 2/00       |
|       | 2/00       |
| 92/00 | 2/00       |
| 66/00 | 2/00       |
| 95/72 | 2/00       |
| 77/50 | 2/00       |
| 80/22 | 2/00       |
| 85/00 | 2/00       |
| 77/25 | 2/00       |
|       | 2/00       |
| 79/35 | 2/00       |
| 72/33 | 2/00       |
| 72/00 | 2/00       |
| 68/86 | 2/00       |
| 69/10 | 2/00       |

| M1    | M2    | M3    |
|-------|-------|-------|
| 77/11 | 76/03 | 77/10 |
| 8/39  | 8/23  | 7/79  |

Kruskal-Wallis ANOVA by Ranks; Var1 (\$  
Independent (grouping) variable: V  
Kruskal-Wallis test: H ( 3, N= 89) =,48200

| Code | Valid | Sum of   |
|------|-------|----------|
| 1    | 19    | 854/500  |
| 2    | 24    | 1009/000 |
| 3    | 23    | 1068/500 |
| 4    | 23    | 1073/000 |

|              |      |
|--------------|------|
| <b>81/77</b> | 2/00 |
| <b>79/13</b> | 2/00 |
| <b>69/00</b> | 2/00 |
| <b>75/91</b> | 2/00 |
|              | 2/00 |
| <b>75/41</b> | 2/00 |
| <b>68/47</b> | 2/00 |
| <b>71/16</b> | 2/00 |
|              | 2/00 |
| <b>69/43</b> | 2/00 |
| <b>66/58</b> | 3/00 |
| <b>82/86</b> | 3/00 |
|              | 3/00 |
| <b>84/71</b> | 3/00 |
| <b>83/00</b> | 3/00 |
| <b>91/72</b> | 3/00 |
|              | 3/00 |
| <b>95/37</b> | 3/00 |
| <b>78/33</b> | 3/00 |
| <b>80/67</b> | 3/00 |
| <b>85/13</b> | 3/00 |
|              | 3/00 |
|              | 3/00 |
| <b>79/41</b> | 3/00 |
| <b>71/92</b> | 3/00 |
| <b>72/00</b> | 3/00 |
| <b>69/08</b> | 3/00 |
| <b>68/98</b> | 3/00 |
| <b>81/91</b> | 3/00 |
| <b>79/17</b> | 3/00 |
| <b>69/00</b> | 3/00 |
| <b>75/99</b> | 3/00 |
| <b>73/00</b> | 3/00 |
| <b>75/75</b> | 3/00 |
| <b>69/00</b> | 3/00 |
| <b>70/28</b> | 3/00 |
|              | 3/00 |
| <b>69/37</b> | 3/00 |
| <b>66/75</b> | 4/00 |
| <b>83/89</b> | 4/00 |
|              | 4/00 |
| <b>84/92</b> | 4/00 |
|              | 4/00 |
| <b>90/42</b> | 4/00 |
| <b>66/00</b> | 4/00 |
| <b>95/44</b> | 4/00 |
| <b>78/85</b> | 4/00 |

|              |      |
|--------------|------|
| <b>81/62</b> | 4/00 |
| <b>86/11</b> | 4/00 |
|              | 4/00 |
|              | 4/00 |
| <b>79/18</b> | 4/00 |
| <b>72/15</b> | 4/00 |
| <b>72/20</b> | 4/00 |
| <b>69/21</b> | 4/00 |
| <b>68/87</b> | 4/00 |
| <b>81/86</b> | 4/00 |
| <b>79/24</b> | 4/00 |
| <b>69/00</b> | 4/00 |
| <b>76/44</b> | 4/00 |
|              | 4/00 |
| <b>76/00</b> | 4/00 |
| <b>69/00</b> | 4/00 |
| <b>70/61</b> | 4/00 |
| <b>88/95</b> | 4/00 |
| <b>69/68</b> | 4/00 |

**M4**  
**77/23**  
**8/36**

Spreadsheet1)  
Var2  
082 p =,9228

Mean  
44/97368  
42/04167  
46/45652  
46/65217

| <b>D</b> | <b>Microcycle</b> |
|----------|-------------------|
| 0/01     | 1/00              |
| 0/00     | 1/00              |
| 0/01     | 1/00              |
| 0/00     | 1/00              |
| 0/01     | 1/00              |
| 0/00     | 1/00              |
| 0/01     | 1/00              |
| 0/00     | 1/00              |
| 0/01     | 1/00              |
| 0/00     | 1/00              |
| 0/01     | 1/00              |
| 0/00     | 1/00              |
| 0/01     | 1/00              |
| 0/01     | 1/00              |
| 0/01     | 1/00              |
| 0/02     | 1/00              |
| 0/00     | 1/00              |
| 0/01     | 1/00              |
|          | 1/00              |
|          | 1/00              |
|          | 1/00              |
| 0/02     | 1/00              |
|          | 1/00              |
|          | 1/00              |
| 0/01     | 2/00              |
| 0/00     | 2/00              |
| 0/00     | 2/00              |
| 0/00     | 2/00              |
|          | 2/00              |
| 0/01     | 2/00              |
| 0/00     | 2/00              |
| 0/00     | 2/00              |
| 0/00     | 2/00              |
| 0/00     | 2/00              |
| 0/00     | 2/00              |
| 0/00     | 2/00              |
| 0/00     | 2/00              |
| 0/01     | 2/00              |
| 0/01     | 2/00              |
| 0/00     | 2/00              |
| 0/01     | 2/00              |
| 0/01     | 2/00              |

**M1**  
**0/01**  
**0/01**

1  
2  
3  
4

|              |      |
|--------------|------|
| <b>0/01</b>  | 2/00 |
| <b>0/00</b>  | 2/00 |
| <b>0/00</b>  | 2/00 |
| <b>0/01</b>  | 2/00 |
|              | 2/00 |
| <b>0/00</b>  | 2/00 |
| <b>0/01</b>  | 2/00 |
| <b>0/02</b>  | 2/00 |
|              | 2/00 |
| <b>0/01</b>  | 2/00 |
| <b>0/01</b>  | 3/00 |
| <b>0/00</b>  | 3/00 |
|              | 3/00 |
| <b>0/00</b>  | 3/00 |
| <b>0/00</b>  | 3/00 |
| <b>0/01</b>  | 3/00 |
|              | 3/00 |
| <b>0/00</b>  | 3/00 |
| <b>0/00</b>  | 3/00 |
| <b>0/00</b>  | 3/00 |
| <b>0/00</b>  | 3/00 |
|              | 3/00 |
|              | 3/00 |
| <b>0/01</b>  | 3/00 |
| <b>-0/70</b> | 3/00 |
| <b>0/00</b>  | 3/00 |
| <b>0/01</b>  | 3/00 |
| <b>0/01</b>  | 3/00 |
| <b>0/00</b>  | 3/00 |
| <b>0/01</b>  | 3/00 |
| <b>0/00</b>  | 3/00 |
| <b>0/02</b>  | 3/00 |
|              | 3/00 |
| <b>0/00</b>  | 3/00 |
| <b>-0/01</b> | 3/00 |
| <b>0/02</b>  | 3/00 |
|              | 3/00 |
| <b>0/01</b>  | 3/00 |
| <b>0/01</b>  | 4/00 |
| <b>0/00</b>  | 4/00 |
|              | 4/00 |
| <b>0/00</b>  | 4/00 |
|              | 4/00 |
| <b>0/02</b>  | 4/00 |
|              | 4/00 |
| <b>0/00</b>  | 4/00 |
| <b>0/00</b>  | 4/00 |

|             |      |
|-------------|------|
| <b>0/00</b> | 4/00 |
| <b>0/00</b> | 4/00 |
|             | 4/00 |
|             | 4/00 |
| <b>0/01</b> | 4/00 |
| <b>0/01</b> | 4/00 |
| <b>0/00</b> | 4/00 |
| <b>0/01</b> | 4/00 |
| <b>0/01</b> | 4/00 |
| <b>0/00</b> | 4/00 |
| <b>0/00</b> | 4/00 |
| <b>0/00</b> | 4/00 |
| <b>0/01</b> | 4/00 |
|             | 4/00 |
| <b>0/00</b> | 4/00 |
| <b>0/00</b> | 4/00 |
| <b>0/02</b> | 4/00 |
| <b>0/00</b> | 4/00 |
| <b>0/00</b> | 4/00 |

| M2   | M3    | M4   |
|------|-------|------|
| 0/01 | -0/03 | 0/01 |
| 0/01 | 0/15  | 0/01 |

**F**

2/44  
3/19  
4/61  
3/05  
2/50  
2/56  
2/25  
3/28  
2/43  
2/20  
4/00  
2/53  
2/61  
2/73  
3/29  
2/72  
2/83  
3/81  
2/83  
2/44  
3/28  
3/77  
2/98  
2/91  
3/54  
2/75  
3/18  
2/69  
2/98  
2/83  
3/71  
3/38  
2/69  
3/00  
3/96

Kruskal-Wallis ANOVA by Ranks; Var1 (Spreadsheet1)  
Independent (grouping) variable: Var2  
Kruskal-Wallis test: H ( 3, N= 87) =1,938919 p =,5852

| Code | Valid | Sum of   | Mean     |
|------|-------|----------|----------|
| 1    | 19    | 968/000  | 50/94737 |
| 2    | 24    | 1036/000 | 43/16667 |
| 3    | 22    | 924/000  | 42/00000 |
| 4    | 22    | 900/000  | 40/90909 |



3/60  
2/75  
3/05  
3/95  
2/83  
3/50  
3/25  
3/06

2/56  
3/33  
3/56

2/79  
3/25  
2/83  
4/00  
2/90  
2/78  
2/81  
2/60

4/00  
3/94  
3/00  
3/77  
3/80  
3/89  
3/21  
3/00  
4/06  
3/00  
3/73  
3/00  
2/69

3/00  
3/13  
3/74

3/94  
4/00  
3/00

3/45  
4/00

**3/25**  
**2/88**

**4/00**  
**4/05**  
**2/71**  
**3/58**  
**4/00**  
**4/00**  
**3/42**  
**3/00**  
**4/23**  
**3/00**  
**3/83**  
**4/67**  
**2/80**  
**3/00**  
**3/00**

Microcycle

1/00  
1/00  
1/00  
1/00  
1/00  
1/00  
1/00  
1/00  
1/00  
1/00  
1/00  
1/00  
1/00  
1/00  
1/00  
1/00  
1/00  
1/00  
1/00  
1/00  
1/00  
1/00  
1/00  
1/00  
2/00  
2/00  
2/00  
2/00  
2/00  
2/00  
2/00  
2/00  
2/00  
2/00  
2/00  
2/00  
2/00  
2/00  
2/00  
2/00  
2/00  
2/00  
2/00

| M1          | M2          | M3          | M4          |
|-------------|-------------|-------------|-------------|
| <b>2/94</b> | <b>3/14</b> | <b>3/29</b> | <b>3/53</b> |
| <b>0/63</b> | <b>0/43</b> | <b>0/49</b> | <b>0/54</b> |

Kruskal-Wallis ANOVA by Ranks; Var1 (Spreads  
Independent (grouping) variable: Var2  
Kruskal-Wallis test: H ( 3, N= 92) =14,36882 p =,0

|   | Code | Valid | Sum of   |
|---|------|-------|----------|
| 1 | 1    | 19    | 583/000  |
| 2 | 2    | 25    | 1057/500 |
| 3 | 3    | 24    | 1180/000 |
| 4 | 4    | 24    | 1457/500 |

2/00

2/00

2/00

2/00

2/00

2/00

2/00

2/00

2/00

2/00

3/00

3/00

3/00

3/00

3/00

3/00

3/00

3/00

3/00

3/00

3/00

3/00

3/00

3/00

3/00

3/00

3/00

3/00

3/00

3/00

3/00

3/00

3/00

3/00

3/00

3/00

3/00

3/00

4/00

4/00

4/00

4/00

4/00

4/00

4/00

4/00

4/00



heet1)  
0024

Mean

30/68421  
42/30000  
49/16667  
60/72917

| SI | Microcycle |
|----|------------|
|    | 2/61 1/00  |
|    | 3/94 1/00  |
|    | 4/71 1/00  |
|    | 4/05 1/00  |
|    | 1/00       |
|    | 4/00 1/00  |
|    | 2/83 1/00  |
|    | 1/00       |
|    | 3/92 1/00  |
|    | 3/97 1/00  |
|    | 3/80 1/00  |
|    | 4/80 1/00  |
|    | 4/00 1/00  |
|    | 3/65 1/00  |
|    | 1/00       |
|    | 3/17 1/00  |
|    | 3/20 1/00  |
|    | 1/00       |
|    | 4/26 1/00  |
|    | 3/67 1/00  |
|    | 3/94 1/00  |
|    | 4/11 1/00  |
|    | 1/00       |
|    | 1/00       |
|    | 1/00       |
|    | 4/00 1/00  |
|    | 1/00       |
|    | 1/00       |
|    | 2/81 2/00  |
|    | 3/56 2/00  |
|    | 3/83 2/00  |
|    | 4/34 2/00  |
|    | 2/00       |
|    | 4/04 2/00  |
|    | 3/92 2/00  |
|    | 3/75 2/00  |
|    | 4/00 2/00  |
|    | 3/83 2/00  |
|    | 3/67 2/00  |
|    | 3/64 2/00  |
|    | 2/00       |
|    | 3/77 2/00  |
|    | 4/13 2/00  |
|    | 3/21 2/00  |
|    | 3/08 2/00  |
|    | 4/00 2/00  |

| M1   |
|------|
| 3/82 |
| 0/55 |

Krusl  
Krusl

1  
2  
3  
4

|             |      |
|-------------|------|
| <b>4/14</b> | 2/00 |
| <b>3/79</b> | 2/00 |
| <b>4/00</b> | 2/00 |
| <b>4/02</b> | 2/00 |
| <b>3/75</b> | 2/00 |
| <b>4/20</b> | 2/00 |
| <b>3/67</b> | 2/00 |
| <b>3/70</b> | 2/00 |
|             | 2/00 |
| <b>3/58</b> | 2/00 |
| <b>3/80</b> | 3/00 |
| <b>3/77</b> | 3/00 |
|             | 3/00 |
| <b>4/46</b> | 3/00 |
| <b>3/50</b> | 3/00 |
| <b>3/92</b> | 3/00 |
| <b>4/00</b> | 3/00 |
| <b>3/58</b> | 3/00 |
| <b>3/83</b> | 3/00 |
| <b>3/76</b> | 3/00 |
| <b>3/96</b> | 3/00 |
|             | 3/00 |
|             | 3/00 |
| <b>4/00</b> | 3/00 |
| <b>3/94</b> | 3/00 |
| <b>3/33</b> | 3/00 |
| <b>3/98</b> | 3/00 |
| <b>3/88</b> | 3/00 |
| <b>4/22</b> | 3/00 |
| <b>3/67</b> | 3/00 |
| <b>3/75</b> | 3/00 |
| <b>3/88</b> | 3/00 |
| <b>3/25</b> | 3/00 |
| <b>3/88</b> | 3/00 |
| <b>3/65</b> | 3/00 |
| <b>3/60</b> | 3/00 |
|             | 3/00 |
| <b>4/10</b> | 3/00 |
| <b>3/28</b> | 4/00 |
| <b>4/10</b> | 4/00 |
|             | 4/00 |
| <b>4/88</b> | 4/00 |
| <b>4/00</b> | 4/00 |
| <b>4/00</b> | 4/00 |
|             | 4/00 |
| <b>4/00</b> | 4/00 |
| <b>4/00</b> | 4/00 |

|             |      |
|-------------|------|
| <b>3/90</b> | 4/00 |
| <b>3/70</b> | 4/00 |
|             | 4/00 |
|             | 4/00 |
| <b>4/00</b> | 4/00 |
| <b>4/05</b> | 4/00 |
| <b>3/15</b> | 4/00 |
| <b>3/64</b> | 4/00 |
| <b>4/00</b> | 4/00 |
| <b>4/13</b> | 4/00 |
| <b>3/73</b> | 4/00 |
| <b>4/00</b> | 4/00 |
| <b>4/05</b> | 4/00 |
| <b>3/50</b> | 4/00 |
| <b>3/93</b> | 4/00 |
| <b>4/92</b> | 4/00 |
| <b>4/00</b> | 4/00 |
| <b>2/92</b> | 4/00 |
| <b>4/00</b> | 4/00 |



| M2          | M3          | M4          |
|-------------|-------------|-------------|
| <b>3/78</b> | <b>3/82</b> | <b>3/91</b> |
| <b>0/35</b> | <b>0/27</b> | <b>0/44</b> |

| MS   |
|------|
| 2/03 |
| 3/11 |
| 4/20 |
| 2/70 |
| 2/28 |
| 2/00 |
| 2/25 |
| 2/42 |
| 2/31 |
| 1/80 |
| 4/00 |
| 2/57 |
| 3/00 |
| 2/68 |
| 3/28 |
| 2/67 |
| 2/31 |
| 3/29 |
| 2/58 |
| 2/31 |
| 3/62 |
| 4/00 |
| 3/29 |
| 2/73 |
| 3/63 |
| 2/56 |
| 3/23 |
| 3/56 |
| 2/98 |
| 2/75 |
| 3/85 |
| 3/75 |
| 2/78 |
| 3/06 |
| 4/00 |

Kal-Wallis ANOVA by Ranks; Var1 (Spreadsheet1)  
 Independent (grouping) variable: Var2  
 Kal-Wallis test: H ( 3, N= 92) =2,688270 p =,4422

| Code | Valid | Sum of   | Mean     |
|------|-------|----------|----------|
| 1    | 19    | 918/500  | 48/34211 |
| 2    | 25    | 1078/500 | 43/14000 |
| 3    | 24    | 1006/000 | 41/91667 |
| 4    | 24    | 1275/000 | 53/12500 |

3/70  
2/77  
3/05  
4/31  
3/00  
3/35  
3/54  
2/98

2/78  
3/62  
3/77

2/83  
3/00  
2/85  
4/00  
2/90  
2/78  
3/68  
2/73

3/92  
4/02  
3/51  
3/96  
3/88  
4/12  
3/54  
2/67  
4/31  
3/00  
3/73  
3/25  
2/79

2/40  
3/05  
3/89

3/79  
4/00  
3/00

3/53  
4/00

**3/95**  
**2/79**

**4/00**  
**4/00**  
**3/39**  
**3/58**  
**4/00**  
**4/00**  
**3/01**  
**3/00**  
**4/36**  
**3/00**  
**3/78**  
**4/67**  
**2/85**  
**2/50**  
**2/65**



2/00

2/00

2/00

2/00

2/00

2/00

2/00

2/00

2/00

2/00

3/00

3/00

3/00

3/00

3/00

3/00

3/00

3/00

3/00

3/00

3/00

3/00

3/00

3/00

3/00

3/00

3/00

3/00

3/00

3/00

3/00

3/00

3/00

3/00

3/00

3/00

3/00

3/00

4/00

4/00

4/00

4/00

4/00

4/00

4/00

4/00

4/00

4/00



heet1)  
0004

Mean  
24/73684  
46/70000  
51/75000  
58/27083

| S | Microcycle |
|---|------------|
|   | 2/36       |
|   | 4/83       |
|   | 4/70       |
|   | 3/25       |
|   |            |
|   | 3/00       |
|   | 3/33       |
|   |            |
|   | 3/75       |
|   | 4/35       |
|   | 3/87       |
|   | 3/20       |
|   | 4/00       |
|   | 3/17       |
|   |            |
|   | 3/22       |
|   | 4/00       |
|   |            |
|   | 4/00       |
|   | 3/68       |
|   | 3/00       |
|   | 4/41       |
|   |            |
|   |            |
|   |            |
|   | 3/00       |
|   |            |
|   |            |
|   | 2/81       |
|   | 4/00       |
|   | 4/10       |
|   | 4/88       |
|   |            |
|   | 3/04       |
|   | 2/75       |
|   | 3/88       |
|   | 4/00       |
|   | 3/93       |
|   | 3/56       |
|   | 3/00       |
|   |            |
|   | 3/85       |
|   | 4/00       |
|   | 3/91       |
|   | 4/00       |
|   | 3/81       |

| M1   |
|------|
| 3/64 |
| 0/66 |

Krusl  
Krusl

- 1
- 2
- 3
- 4

|             |      |
|-------------|------|
| <b>4/00</b> | 2/00 |
| <b>3/85</b> | 2/00 |
| <b>3/15</b> | 2/00 |
| <b>4/00</b> | 2/00 |
| <b>4/75</b> | 2/00 |
| <b>4/53</b> | 2/00 |
| <b>4/25</b> | 2/00 |
| <b>3/00</b> | 2/00 |
|             | 2/00 |
| <b>3/58</b> | 2/00 |
| <b>3/36</b> | 3/00 |
| <b>3/88</b> | 3/00 |
|             | 3/00 |
| <b>4/92</b> | 3/00 |
| <b>4/00</b> | 3/00 |
| <b>3/00</b> | 3/00 |
| <b>3/00</b> | 3/00 |
| <b>3/79</b> | 3/00 |
| <b>4/00</b> | 3/00 |
| <b>3/92</b> | 3/00 |
| <b>2/88</b> | 3/00 |
|             | 3/00 |
|             | 3/00 |
| <b>3/92</b> | 3/00 |
| <b>4/15</b> | 3/00 |
| <b>3/72</b> | 3/00 |
| <b>4/00</b> | 3/00 |
| <b>3/00</b> | 3/00 |
| <b>3/88</b> | 3/00 |
| <b>3/83</b> | 3/00 |
| <b>2/83</b> | 3/00 |
| <b>4/13</b> | 3/00 |
| <b>4/75</b> | 3/00 |
| <b>3/88</b> | 3/00 |
| <b>3/75</b> | 3/00 |
| <b>3/00</b> | 3/00 |
|             | 3/00 |
| <b>4/05</b> | 3/00 |
| <b>3/33</b> | 4/00 |
| <b>4/00</b> | 4/00 |
|             | 4/00 |
| <b>5/00</b> | 4/00 |
| <b>5/00</b> | 4/00 |
| <b>3/00</b> | 4/00 |
|             | 4/00 |
| <b>4/00</b> | 4/00 |
| <b>4/00</b> | 4/00 |



|             |      |
|-------------|------|
| <b>4/00</b> | 4/00 |
| <b>3/05</b> | 4/00 |
|             | 4/00 |
|             | 4/00 |
| <b>4/00</b> | 4/00 |
| <b>4/00</b> | 4/00 |
| <b>3/94</b> | 4/00 |
| <b>4/00</b> | 4/00 |
| <b>3/00</b> | 4/00 |
| <b>4/00</b> | 4/00 |
| <b>3/87</b> | 4/00 |
| <b>3/00</b> | 4/00 |
| <b>4/00</b> | 4/00 |
| <b>3/75</b> | 4/00 |
| <b>4/11</b> | 4/00 |
| <b>4/83</b> | 4/00 |
| <b>3/00</b> | 4/00 |
| <b>3/08</b> | 4/00 |
| <b>4/00</b> | 4/00 |

| M2          | M3          | M4          |
|-------------|-------------|-------------|
| <b>3/79</b> | <b>3/73</b> | <b>3/83</b> |
| <b>0/56</b> | <b>0/55</b> | <b>0/60</b> |

**M**

3/17

4/75

4/78

5/00

Kal-Wallis ANOVA by Ranks; Var1 (Spreadsheet1)

Independent (grouping) variable: Var2

Kal-Wallis test:  $H(3, N=92) = 1,491355$   $p = ,6843$

3/78

4/33

| Code | Valid | Sum of   | Mean     |
|------|-------|----------|----------|
| 1    | 19    | 798/000  | 42/00000 |
| 2    | 25    | 1189/000 | 47/56000 |
| 3    | 24    | 1063/500 | 44/31250 |
| 4    | 24    | 1227/500 | 51/14583 |

4/00

4/92

3/93

3/40

4/00

4/00

3/78

4/07

4/00

3/73

4/00

4/88

3/58

2/50

4/65

4/40

5/00

3/68

3/42

4/19

4/00

4/89

3/42

2/97

4/00

4/00

4/00

4/00

4/00

4/00  
3/92  
4/00  
4/58  
4/92  
4/83  
4/25  
3/77

4/53  
3/57  
4/54

5/00  
4/00  
3/74  
4/50  
3/75  
4/00  
4/88  
2/73

4/00  
4/08  
4/00  
4/00  
4/00  
3/88  
3/83  
3/92  
4/23  
4/75  
3/96  
3/85  
3/69

4/10  
3/40  
4/95

5/00  
4/00  
4/00

3/80  
4/00

**4/95**  
**3/13**

**4/00**  
**4/00**  
**4/00**  
**4/00**  
**4/00**  
**3/94**  
**3/87**  
**4/00**  
**4/00**  
**3/81**  
**4/11**  
**4/92**  
**3/65**  
**3/25**  
**4/00**



2/00

2/00

2/00

2/00

2/00

2/00

2/00

2/00

2/00

2/00

3/00

3/00

3/00

3/00

3/00

3/00

3/00

3/00

3/00

3/00

3/00

3/00

3/00

3/00

3/00

3/00

3/00

3/00

3/00

3/00

3/00

3/00

3/00

3/00

3/00

3/00

3/00

3/00

4/00

4/00

4/00

4/00

4/00

4/00

4/00

4/00

4/00



heet1)  
9145

Mean  
47/07895  
49/38000  
44/87500  
44/66667

| TW    | Microcycle |
|-------|------------|
| 12/61 | 1/00       |
| 19/83 | 1/00       |
| 23/00 | 1/00       |
| 18/05 | 1/00       |
|       | 1/00       |
| 15/56 | 1/00       |
| 15/06 | 1/00       |
|       | 1/00       |
| 16/17 | 1/00       |
| 18/93 | 1/00       |
| 16/34 | 1/00       |
|       | 1/00       |
| 20/00 | 1/00       |
| 15/92 | 1/00       |
|       | 1/00       |
| 15/78 | 1/00       |
| 16/68 | 1/00       |
|       | 1/00       |
| 18/82 | 1/00       |
| 15/67 | 1/00       |
| 16/08 | 1/00       |
| 20/50 | 1/00       |
|       | 1/00       |
|       | 1/00       |
| 16/00 | 1/00       |
|       | 1/00       |
|       | 1/00       |
| 12/88 | 2/00       |
| 19/11 | 2/00       |
| 20/10 | 2/00       |
| 20/48 | 2/00       |
|       | 2/00       |
| 16/40 | 2/00       |
| 17/25 | 2/00       |
| 17/13 | 2/00       |
| 18/40 | 2/00       |
| 18/89 | 2/00       |
| 16/60 | 2/00       |
| 15/19 | 2/00       |
|       | 2/00       |
| 19/19 | 2/00       |
| 11/63 | 2/00       |
| 16/60 | 2/00       |
| 17/14 | 2/00       |
| 19/77 | 2/00       |

| M1    |
|-------|
| 17/28 |
| 2/48  |

Krusl  
Krusl

- 1
- 2
- 3
- 4



|              |      |
|--------------|------|
| <b>19/44</b> | 2/00 |
| <b>17/08</b> | 2/00 |
| <b>17/25</b> | 2/00 |
| <b>20/86</b> | 2/00 |
| <b>19/25</b> | 2/00 |
| <b>20/42</b> | 2/00 |
| <b>18/96</b> | 2/00 |
| <b>16/51</b> | 2/00 |
|              | 2/00 |
| <b>17/03</b> | 2/00 |
| <b>17/68</b> | 3/00 |
| <b>19/52</b> | 3/00 |
|              | 3/00 |
| <b>20/00</b> | 3/00 |
| <b>17/75</b> | 3/00 |
| <b>16/34</b> | 3/00 |
| <b>19/50</b> | 3/00 |
| <b>16/92</b> | 3/00 |
| <b>17/39</b> | 3/00 |
| <b>19/04</b> | 3/00 |
| <b>14/90</b> | 3/00 |
|              | 3/00 |
|              | 3/00 |
| <b>19/83</b> | 3/00 |
| <b>20/13</b> | 3/00 |
| <b>17/56</b> | 3/00 |
| <b>19/71</b> | 3/00 |
| <b>18/55</b> | 3/00 |
| <b>19/98</b> | 3/00 |
| <b>18/08</b> | 3/00 |
| <b>16/17</b> | 3/00 |
| <b>20/23</b> | 3/00 |
| <b>18/75</b> | 3/00 |
| <b>19/17</b> | 3/00 |
| <b>17/50</b> | 3/00 |
| <b>15/77</b> | 3/00 |
|              | 3/00 |
| <b>17/65</b> | 3/00 |
| <b>16/18</b> | 4/00 |
| <b>20/68</b> | 4/00 |
|              | 4/00 |
| <b>22/60</b> | 4/00 |
| <b>21/00</b> | 4/00 |
| <b>17/00</b> | 4/00 |
|              | 4/00 |
| <b>18/78</b> | 4/00 |
| <b>20/00</b> | 4/00 |

|              |      |
|--------------|------|
| <b>20/05</b> | 4/00 |
| <b>15/54</b> | 4/00 |
|              | 4/00 |
|              | 4/00 |
| <b>20/00</b> | 4/00 |
| <b>20/10</b> | 4/00 |
| <b>17/19</b> | 4/00 |
| <b>18/79</b> | 4/00 |
| <b>19/00</b> | 4/00 |
| <b>20/06</b> | 4/00 |
| <b>17/89</b> | 4/00 |
| <b>17/00</b> | 4/00 |
| <b>20/64</b> | 4/00 |
| <b>17/06</b> | 4/00 |
| <b>19/75</b> | 4/00 |
| <b>24/00</b> | 4/00 |
| <b>16/30</b> | 4/00 |
| <b>14/75</b> | 4/00 |
| <b>17/65</b> | 4/00 |

| M2    | M3    | M4    |
|-------|-------|-------|
| 17/74 | 18/25 | 18/83 |
| 2/26  | 1/52  | 2/25  |

| Dur   |
|-------|
| 97/00 |

Kal-Wallis ANOVA by Ranks; Var1 (Spreadsheet1)

Independent (grouping) variable: Var2

Kal-Wallis test:  $H(3, N=91) = 6,255347$   $p = ,0998$

84/00

110/00

| Code | Valid | Sum of   | Mean     |
|------|-------|----------|----------|
| 1    | 18    | 615/500  | 34/19444 |
| 2    | 25    | 1108/000 | 44/32000 |
| 3    | 24    | 1159/000 | 48/29167 |
| 4    | 24    | 1303/500 | 54/31250 |

110/00

97/00

97/00

84/00

51/00

84/00

94/33

84/00

80/40

85/38

70/06

59/80

52/42

68/30

68/71

66/18

70/98

56/87

80/27

82/92

57/67

69/17

72/67

60/38

85/84  
64/67  
72/29  
86/22  
77/42  
66/16  
74/18  
54/68

65/08  
67/25  
82/04

65/49  
66/27  
52/88  
66/35  
77/40  
59/59  
72/67  
55/98

61/73  
56/23  
63/55  
62/69  
76/13  
75/50  
67/81  
51/27  
59/31  
59/29  
59/44  
88/78  
52/77  
115/00  
83/78  
75/53  
75/94

68/94

67/00  
53/63  
74/57  
67/42

**79/47**  
**68/93**  
**49/00**

**76/22**  
**69/92**  
**72/75**  
**76/05**  
**76/76**  
**74/63**  
**76/44**  
**62/80**  
**77/25**  
**63/46**  
**72/35**  
**75/40**  
**73/78**  
**81/87**  
**77/30**



2/00

2/00

2/00

2/00

2/00

2/00

2/00

2/00

2/00

2/00

3/00

3/00

3/00

3/00

3/00

3/00

3/00

3/00

3/00

3/00

3/00

3/00

3/00

3/00

3/00

3/00

3/00

3/00

3/00

3/00

3/00

3/00

3/00

3/00

3/00

3/00

3/00

3/00

4/00

4/00

4/00

4/00

4/00

4/00

4/00

4/00

4/00





| RPE  | Microcycle |
|------|------------|
| 6/48 | 1/00       |
| 5/83 | 1/00       |
| 5/92 | 1/00       |
| 7/88 | 1/00       |
|      | 1/00       |
| 7/06 | 1/00       |
| 8/33 | 1/00       |
|      | 1/00       |
| 8/03 | 1/00       |
| 6/33 | 1/00       |
| 7/19 | 1/00       |
| 6/00 | 1/00       |
| 6/08 | 1/00       |
| 7/08 | 1/00       |
|      | 1/00       |
| 6/44 | 1/00       |
| 7/30 | 1/00       |
|      | 1/00       |
| 7/79 | 1/00       |
| 7/33 | 1/00       |
| 7/30 | 1/00       |
| 6/52 | 1/00       |
|      | 1/00       |
|      | 1/00       |
| 6/00 | 1/00       |
|      | 1/00       |
|      | 1/00       |
| 6/63 | 2/00       |
| 6/06 | 2/00       |
| 6/80 | 2/00       |
| 6/13 | 2/00       |
|      | 2/00       |
| 6/08 | 2/00       |
| 5/92 | 2/00       |
| 6/03 | 2/00       |
| 5/13 | 2/00       |
| 6/08 | 2/00       |
| 5/77 | 2/00       |
| 6/44 | 2/00       |
|      | 2/00       |
| 5/33 | 2/00       |
| 6/08 | 2/00       |
| 4/71 | 2/00       |
| 5/59 | 2/00       |
| 4/77 | 2/00       |

| M1   |
|------|
| 6/89 |
| 0/78 |

heet1)  
0003

Mean

71/90909  
40/08000  
33/12000  
44/80000

Krusl  
Krusl

1  
2  
3  
4

|             |      |
|-------------|------|
| <b>5/41</b> | 2/00 |
| <b>3/42</b> | 2/00 |
| <b>6/21</b> | 2/00 |
| <b>5/49</b> | 2/00 |
| <b>6/54</b> | 2/00 |
| <b>4/34</b> | 2/00 |
| <b>5/72</b> | 2/00 |
| <b>5/81</b> | 2/00 |
|             | 2/00 |
| <b>7/22</b> | 2/00 |
| <b>5/42</b> | 3/00 |
| <b>5/38</b> | 3/00 |
|             | 3/00 |
| <b>6/42</b> | 3/00 |
| <b>6/22</b> | 3/00 |
| <b>5/00</b> | 3/00 |
| <b>6/67</b> | 3/00 |
| <b>5/71</b> | 3/00 |
| <b>6/00</b> | 3/00 |
| <b>5/92</b> | 3/00 |
| <b>5/70</b> | 3/00 |
|             | 3/00 |
|             | 3/00 |
| <b>4/10</b> | 3/00 |
| <b>5/33</b> | 3/00 |
| <b>4/91</b> | 3/00 |
| <b>4/96</b> | 3/00 |
| <b>3/88</b> | 3/00 |
| <b>4/50</b> | 3/00 |
| <b>5/56</b> | 3/00 |
| <b>5/39</b> | 3/00 |
| <b>5/15</b> | 3/00 |
| <b>6/75</b> | 3/00 |
| <b>5/09</b> | 3/00 |
| <b>7/58</b> | 3/00 |
| <b>6/83</b> | 3/00 |
|             | 3/00 |
| <b>7/61</b> | 3/00 |
| <b>5/08</b> | 4/00 |
| <b>4/64</b> | 4/00 |
|             | 4/00 |
| <b>5/60</b> | 4/00 |
|             | 4/00 |
| <b>4/08</b> | 4/00 |
| <b>8/00</b> | 4/00 |
| <b>5/18</b> | 4/00 |
| <b>5/75</b> | 4/00 |

|             |      |
|-------------|------|
| <b>4/92</b> | 4/00 |
| <b>6/08</b> | 4/00 |
|             | 4/00 |
|             | 4/00 |
| <b>4/20</b> | 4/00 |
| <b>5/56</b> | 4/00 |
| <b>5/30</b> | 4/00 |
| <b>5/85</b> | 4/00 |
| <b>3/43</b> | 4/00 |
| <b>5/66</b> | 4/00 |
| <b>4/06</b> | 4/00 |
| <b>4/44</b> | 4/00 |
| <b>5/57</b> | 4/00 |
| <b>5/19</b> | 4/00 |
| <b>4/45</b> | 4/00 |
| <b>4/78</b> | 4/00 |
| <b>6/98</b> | 4/00 |
| <b>3/96</b> | 4/00 |
| <b>5/96</b> | 4/00 |

| M2          | M3          | M4          |
|-------------|-------------|-------------|
| <b>5/75</b> | <b>5/67</b> | <b>5/20</b> |
| <b>0/82</b> | <b>0/97</b> | <b>1/01</b> |

**ITL**  
799/00

Kal-Wallis ANOVA by Ranks; Var1 (Spreadsheet1)  
Independent (grouping) variable: Var2  
Kal-Wallis test: H ( 3, N= 92) =29,44080 p =,0000

756/00  
926/00

| Code | Valid | Sum of   | Mean     |
|------|-------|----------|----------|
| 1    | 19    | 1394/500 | 73/39474 |
| 2    | 25    | 1167/000 | 46/68000 |
| 3    | 24    | 1001/500 | 41/72917 |
| 4    | 24    | 715/000  | 29/79167 |

1022/67

841/00

737/33

756/00

459/00

781/67

773/33

756/00

611/64

516/06

539/58

487/50

458/83

474/25

441/56

445/50

418/63

754/83

625/08

466/67

533/23

429/42

360/10

**634/25**  
**444/17**  
**545/00**  
**643/94**  
**518/11**  
**363/57**  
**467/50**  
**375/28**

**440/42**  
**390/51**  
**447/67**

**425/83**  
**396/22**  
**408/88**  
**396/83**  
**574/23**  
**412/67**  
**444/35**  
**435/28**

**266/19**  
**351/36**  
**337/13**  
**340/76**  
**502/06**  
**502/56**  
**345/13**  
**363/67**  
**365/36**  
**436/08**  
**342/51**  
**657/00**  
**442/06**

**696/50**  
**423/33**  
**420/70**

**497/56**

**302/38**  
**248/00**  
**469/46**  
**269/25**

**429/11**  
**439/06**

**341/60**  
**399/54**  
**514/66**  
**445/70**  
**330/02**  
**502/25**  
**372/03**  
**348/83**  
**447/18**  
**378/17**  
**353/08**  
**443/29**  
**588/94**  
**294/60**  
**468/64**









heet1)  
0000

Mean  
75/63636  
49/25000  
31/54167  
29/79167

| TD      | Microcycle |
|---------|------------|
| 9547/70 | 1/00       |
|         | 1/00       |
|         | 1/00       |
|         | 1/00       |
|         | 1/00       |
| 7154/11 | 1/00       |
| 7995/51 | 1/00       |
|         | 1/00       |
| 8657/16 | 1/00       |
|         | 1/00       |
| 8488/00 | 1/00       |
|         | 1/00       |
|         | 1/00       |
| 8872/27 | 1/00       |
|         | 1/00       |
| 7842/40 | 1/00       |
|         | 1/00       |
| 4379/56 | 1/00       |
| 7143/28 | 1/00       |
|         | 1/00       |
| 8194/79 | 1/00       |
|         | 1/00       |
|         | 1/00       |
|         | 1/00       |
|         | 1/00       |
| 8006/00 | 1/00       |
|         | 1/00       |
|         | 1/00       |
| 8422/97 | 2/00       |
|         | 2/00       |
|         | 2/00       |
| 5935/84 | 2/00       |
| 3951/05 | 2/00       |
| 3891/52 | 2/00       |
| 5713/46 | 2/00       |
| 5860/69 | 2/00       |
| 6185/22 | 2/00       |
|         | 2/00       |
| 5273/72 | 2/00       |
| 8981/14 | 2/00       |
|         | 2/00       |
| 8370/31 | 2/00       |
| 3972/00 | 2/00       |
| 6425/43 | 2/00       |
| 6809/02 | 2/00       |
| 5411/12 | 2/00       |

| M1      |
|---------|
| 7843/71 |
| 1348/24 |

Krusl  
Krusl

- 1
- 2
- 3
- 4

|                |      |
|----------------|------|
| <b>8057/83</b> | 2/00 |
| <b>5900/46</b> | 2/00 |
| <b>6514/26</b> | 2/00 |
| <b>7927/81</b> | 2/00 |
| <b>7194/86</b> | 2/00 |
| <b>6543/46</b> | 2/00 |
| <b>6503/46</b> | 2/00 |
| <b>4889/08</b> | 2/00 |
|                | 2/00 |
| <b>4802/96</b> | 2/00 |
| <b>5083/56</b> | 3/00 |
|                | 3/00 |
|                | 3/00 |
| <b>5360/75</b> | 3/00 |
| <b>4471/60</b> | 3/00 |
| <b>3522/27</b> | 3/00 |
| <b>5723/86</b> | 3/00 |
| <b>6131/21</b> | 3/00 |
| <b>5149/76</b> | 3/00 |
|                | 3/00 |
| <b>4252/26</b> | 3/00 |
|                | 3/00 |
|                | 3/00 |
| <b>5241/52</b> | 3/00 |
| <b>4446/00</b> | 3/00 |
| <b>5428/28</b> | 3/00 |
| <b>5053/90</b> | 3/00 |
| <b>6619/24</b> | 3/00 |
| <b>5818/48</b> | 3/00 |
| <b>4570/74</b> | 3/00 |
| <b>4210/70</b> | 3/00 |
| <b>4418/85</b> | 3/00 |
| <b>5208/88</b> | 3/00 |
| <b>4762/76</b> | 3/00 |
| <b>9992/03</b> | 3/00 |
| <b>4254/14</b> | 3/00 |
|                | 3/00 |
| <b>7605/35</b> | 3/00 |
| <b>6285/84</b> | 4/00 |
|                | 4/00 |
|                | 4/00 |
| <b>4648/00</b> | 4/00 |
|                | 4/00 |
| <b>4345/31</b> | 4/00 |
| <b>3722/66</b> | 4/00 |
| <b>4866/59</b> | 4/00 |
| <b>5505/18</b> | 4/00 |

|                |      |
|----------------|------|
|                | 4/00 |
| <b>4900/01</b> | 4/00 |
|                | 4/00 |
|                | 4/00 |
| <b>6515/61</b> | 4/00 |
| <b>6010/22</b> | 4/00 |
| <b>5765/12</b> | 4/00 |
| <b>6189/37</b> | 4/00 |
| <b>6057/70</b> | 4/00 |
| <b>5820/90</b> | 4/00 |
| <b>5208/69</b> | 4/00 |
| <b>4669/42</b> | 4/00 |
| <b>5770/93</b> | 4/00 |
| <b>5033/35</b> | 4/00 |
| <b>6153/37</b> | 4/00 |
| <b>4739/38</b> | 4/00 |
| <b>5972/76</b> | 4/00 |
|                | 4/00 |
| <b>6419/00</b> | 4/00 |

| M2             | M3             | M4             |
|----------------|----------------|----------------|
| <b>6240/77</b> | <b>5333/01</b> | <b>5457/11</b> |
| <b>1454/12</b> | <b>1378/38</b> | <b>772/95</b>  |

**PL**  
**1065/70**

Kal-Wallis ANOVA by Ranks; Var1 (Spreadsheet1)  
Independent (grouping) variable: Var2  
Kal-Wallis test: H ( 3, N= 77) =21,03442 p =,0001

**558/90**  
**766/04**

| Code | Valid | Sum of   | Mean     |
|------|-------|----------|----------|
| 1    | 11    | 692/000  | 62/90909 |
| 2    | 23    | 1013/000 | 44/04348 |
| 3    | 22    | 606/000  | 27/54545 |
| 4    | 21    | 692/000  | 32/95238 |

**988/02**  
**1063/97**

**829/00**

**807/24**

**615/00**  
**736/54**

**820/09**

**749/00**

**892/13**

**599/61**  
**464/27**  
**378/27**  
**527/53**  
**626/26**  
**671/34**

**657/14**  
**775/12**

**748/27**  
**419/00**  
**688/08**  
**840/47**  
**634/29**

811/57  
563/93  
712/44  
779/42  
864/58  
705/21  
659/27  
508/67

521/29  
616/46

576/17  
510/03  
350/85  
544/34  
660/05  
559/46

524/34

496/40  
506/39  
566/38  
642/65  
770/78  
585/85  
440/37  
465/26  
459/06  
633/79  
530/82  
997/02  
445/69

846/81  
700/63

487/00

411/83  
387/61  
559/64  
586/17

**585/20**

**588/31**

**641/23**

**646/21**

**768/00**

**698/47**

**594/75**

**498/14**

**548/68**

**583/57**

**602/18**

**641/69**

**553/39**

**618/14**

**726/65**









heet1)  
0006

Mean  
61/00000  
43/26087  
28/77273  
33/52381

| ACC   | Microcycle |
|-------|------------|
| 22/00 | 1/00       |
|       | 1/00       |
|       | 1/00       |
|       | 1/00       |
|       | 1/00       |
| 21/00 | 1/00       |
| 15/33 | 1/00       |
|       | 1/00       |
| 22/67 | 1/00       |
|       | 1/00       |
| 20/00 | 1/00       |
|       | 1/00       |
| 23/33 | 1/00       |
|       | 1/00       |
| 31/00 | 1/00       |
|       | 1/00       |
| 10/00 | 1/00       |
| 14/17 | 1/00       |
|       | 1/00       |
| 17/83 | 1/00       |
|       | 1/00       |
|       | 1/00       |
|       | 1/00       |
| 17/00 | 1/00       |
|       | 1/00       |
|       | 1/00       |
| 21/93 | 2/00       |
|       | 2/00       |
|       | 2/00       |
| 18/89 | 2/00       |
| 10/00 | 2/00       |
| 14/61 | 2/00       |
| 16/58 | 2/00       |
| 11/92 | 2/00       |
| 15/41 | 2/00       |
|       | 2/00       |
| 14/25 | 2/00       |
| 25/83 | 2/00       |
|       | 2/00       |
| 28/52 | 2/00       |
| 8/00  | 2/00       |
| 28/25 | 2/00       |
| 29/50 | 2/00       |
| 11/96 | 2/00       |

| M1    |
|-------|
| 19/48 |
| 5/57  |

Krusl  
Krusl

- 1
- 2
- 3
- 4

|              |      |
|--------------|------|
| <b>23/17</b> | 2/00 |
| <b>22/22</b> | 2/00 |
| <b>16/61</b> | 2/00 |
| <b>29/94</b> | 2/00 |
| <b>17/81</b> | 2/00 |
| <b>20/88</b> | 2/00 |
| <b>15/42</b> | 2/00 |
| <b>21/20</b> | 2/00 |
|              | 2/00 |
| <b>22/54</b> | 2/00 |
| <b>18/71</b> | 3/00 |
|              | 3/00 |
|              | 3/00 |
| <b>15/19</b> | 3/00 |
| <b>16/06</b> | 3/00 |
| <b>12/60</b> | 3/00 |
| <b>17/85</b> | 3/00 |
| <b>11/95</b> | 3/00 |
| <b>17/21</b> | 3/00 |
|              | 3/00 |
| <b>10/19</b> | 3/00 |
|              | 3/00 |
|              | 3/00 |
| <b>18/46</b> | 3/00 |
| <b>12/00</b> | 3/00 |
| <b>24/84</b> | 3/00 |
| <b>18/08</b> | 3/00 |
| <b>10/18</b> | 3/00 |
| <b>14/71</b> | 3/00 |
| <b>13/44</b> | 3/00 |
| <b>11/13</b> | 3/00 |
| <b>20/44</b> | 3/00 |
| <b>14/27</b> | 3/00 |
| <b>20/60</b> | 3/00 |
| <b>21/67</b> | 3/00 |
| <b>18/92</b> | 3/00 |
|              | 3/00 |
| <b>28/13</b> | 3/00 |
| <b>21/17</b> | 4/00 |
|              | 4/00 |
|              | 4/00 |
| <b>17/00</b> | 4/00 |
|              | 4/00 |
| <b>17/75</b> | 4/00 |
| <b>11/88</b> | 4/00 |
| <b>14/64</b> | 4/00 |
| <b>16/91</b> | 4/00 |

|              |      |
|--------------|------|
|              | 4/00 |
| <b>13/33</b> | 4/00 |
|              | 4/00 |
|              | 4/00 |
| <b>20/69</b> | 4/00 |
| <b>18/75</b> | 4/00 |
| <b>20/16</b> | 4/00 |
| <b>23/05</b> | 4/00 |
| <b>11/85</b> | 4/00 |
| <b>18/37</b> | 4/00 |
| <b>18/70</b> | 4/00 |
| <b>15/73</b> | 4/00 |
| <b>22/15</b> | 4/00 |
| <b>15/25</b> | 4/00 |
| <b>22/55</b> | 4/00 |
| <b>19/43</b> | 4/00 |
| <b>26/39</b> | 4/00 |
|              | 4/00 |
| <b>42/58</b> | 4/00 |

| M2           | M3           | M4           |
|--------------|--------------|--------------|
| <b>19/37</b> | <b>16/67</b> | <b>19/44</b> |
| <b>6/36</b>  | <b>4/71</b>  | <b>6/49</b>  |

**DCC**  
**30/67**

Kal-Wallis ANOVA by Ranks; Var1 (Spreadsheet1)  
Independent (grouping) variable: Var2  
Kal-Wallis test: H ( 3, N= 77) =3,603580 p =,3076

**20/00**  
**11/00**

| Code | Valid | Sum of   | Mean     |
|------|-------|----------|----------|
| 1    | 11    | 480/0000 | 43/63636 |
| 2    | 23    | 969/5000 | 42/15217 |
| 3    | 22    | 692/0000 | 31/45455 |
| 4    | 21    | 861/5000 | 41/02381 |

**22/00**

**19/00**

**32/00**

**39/00**

**9/00**

**21/17**

**26/00**

**31/00**

**33/38**

**17/06**

**10/00**

**13/71**

**21/87**

**14/08**

**20/55**

**16/42**

**39/67**

**40/19**

**17/00**

**39/35**

**27/67**

**20/83**

**28/92**  
**24/22**  
**27/40**  
**30/82**  
**22/27**  
**25/86**  
**21/50**  
**28/56**

**19/58**  
**25/00**

**15/19**  
**15/56**  
**10/56**  
**22/26**  
**16/69**  
**19/97**

**10/13**

**20/38**  
**14/00**  
**29/81**  
**17/99**  
**17/50**  
**17/38**  
**15/88**  
**16/70**  
**21/51**  
**18/70**  
**18/51**  
**37/78**  
**19/24**

**33/96**  
**29/90**

**16/33**

**13/38**  
**13/88**  
**13/62**  
**18/19**

**8/15**

**27/22**

**22/58**

**28/43**

**22/40**

**16/83**

**18/85**

**16/94**

**21/57**

**26/20**

**17/28**

**23/95**

**17/15**

**26/29**

**28/07**





2/00

2/00

2/00

2/00

2/00

2/00

2/00

2/00

2/00

2/00

3/00

3/00

3/00

3/00

3/00

3/00

3/00

3/00

3/00

3/00

3/00

3/00

3/00

3/00

3/00

3/00

3/00

3/00

3/00

3/00

3/00

3/00

3/00

3/00

3/00

3/00

3/00

3/00

3/00

4/00

4/00

4/00

4/00

4/00

4/00

4/00

4/00

4/00



| RHI    | Microcycle |
|--------|------------|
| 243/39 | 1/00       |
|        | 1/00       |
|        | 1/00       |
|        | 1/00       |
|        | 1/00       |
|        | 1/00       |
|        | 1/00       |
| 308/32 | 1/00       |
| 130/01 | 1/00       |
|        | 1/00       |
| 165/79 | 1/00       |
|        | 1/00       |
| 244/09 | 1/00       |
|        | 1/00       |
|        | 1/00       |
| 447/29 | 1/00       |
|        | 1/00       |
| 599/32 | 1/00       |
|        | 1/00       |
| 48/28  | 1/00       |
| 292/72 | 1/00       |
|        | 1/00       |
| 298/39 | 1/00       |
|        | 1/00       |
|        | 1/00       |
|        | 1/00       |
| 459/00 | 1/00       |
|        | 1/00       |
| 317/75 | 2/00       |
|        | 2/00       |
|        | 2/00       |
|        | 2/00       |
| 278/95 | 2/00       |
| 293/35 | 2/00       |
| 145/67 | 2/00       |
| 216/07 | 2/00       |
| 167/29 | 2/00       |
| 300/54 | 2/00       |
|        | 2/00       |
| 253/08 | 2/00       |
| 497/33 | 2/00       |
|        | 2/00       |
| 554/67 | 2/00       |
| 251/00 | 2/00       |
| 399/00 | 2/00       |
| 277/44 | 2/00       |

| M1     |
|--------|
| 294/24 |
| 159/04 |

heet1)  
1239

Mean  
45/45455  
45/82609  
31/90909  
35/57143

Krusl  
Krusl

1  
2  
3  
4

|               |      |
|---------------|------|
| <b>182/86</b> | 2/00 |
| <b>317/82</b> | 2/00 |
| <b>216/69</b> | 2/00 |
| <b>174/70</b> | 2/00 |
| <b>300/99</b> | 2/00 |
| <b>296/57</b> | 2/00 |
| <b>257/43</b> | 2/00 |
| <b>236/10</b> | 2/00 |
| <b>286/86</b> | 2/00 |
|               | 2/00 |
| <b>116/99</b> | 3/00 |
|               | 3/00 |
|               | 3/00 |
|               | 3/00 |
| <b>212/61</b> | 3/00 |
| <b>89/69</b>  | 3/00 |
| <b>97/00</b>  | 3/00 |
| <b>279/98</b> | 3/00 |
| <b>175/64</b> | 3/00 |
| <b>274/67</b> | 3/00 |
|               | 3/00 |
| <b>143/45</b> | 3/00 |
|               | 3/00 |
|               | 3/00 |
| <b>244/53</b> | 3/00 |
| <b>171/68</b> | 3/00 |
| <b>327/32</b> | 3/00 |
| <b>164/18</b> | 3/00 |
| <b>184/23</b> | 3/00 |
| <b>183/61</b> | 3/00 |
| <b>124/21</b> | 3/00 |
| <b>172/62</b> | 3/00 |
| <b>149/44</b> | 3/00 |
| <b>191/59</b> | 3/00 |
| <b>143/36</b> | 3/00 |
| <b>464/72</b> | 3/00 |
| <b>205/84</b> | 3/00 |
|               | 3/00 |
| <b>237/42</b> | 4/00 |
|               | 4/00 |
|               | 4/00 |
| <b>209/00</b> | 4/00 |
| <b>235/00</b> | 4/00 |
|               | 4/00 |
| <b>107/59</b> | 4/00 |
| <b>127/63</b> | 4/00 |
| <b>141/91</b> | 4/00 |

|               |      |
|---------------|------|
| <b>232/25</b> | 4/00 |
|               | 4/00 |
| <b>146/84</b> | 4/00 |
|               | 4/00 |
|               | 4/00 |
| <b>346/34</b> | 4/00 |
| <b>340/28</b> | 4/00 |
| <b>318/95</b> | 4/00 |
| <b>295/47</b> | 4/00 |
| <b>153/39</b> | 4/00 |
| <b>202/79</b> | 4/00 |
| <b>169/49</b> | 4/00 |
| <b>156/13</b> | 4/00 |
| <b>207/81</b> | 4/00 |
| <b>177/93</b> | 4/00 |
| <b>223/73</b> | 4/00 |
| <b>115/75</b> | 4/00 |
| <b>269/90</b> | 4/00 |
|               | 4/00 |

| M2            | M3            | M4            |
|---------------|---------------|---------------|
| <b>282/83</b> | <b>196/07</b> | <b>210/27</b> |
| <b>98/62</b>  | <b>86/17</b>  | <b>72/11</b>  |

| SP           |
|--------------|
| <b>45/91</b> |

Kal-Wallis ANOVA by Ranks; Var1 (Spreadsheet1)  
 Independent (grouping) variable: Var2  
 Kal-Wallis test: H ( 3, N= 75) =12,86465 p =,0049

| Code | Valid | Sum of   | Mean     |
|------|-------|----------|----------|
| 1    | 11    | 508/000  | 46/18182 |
| 2    | 22    | 1074/000 | 48/81818 |
| 3    | 21    | 584/000  | 27/80952 |
| 4    | 21    | 684/000  | 32/57143 |

**74/68**

**7/24**

**10/35**

**66/20**

**155/22**

**320/28**

**0/00**

**89/23**

**53/37**

**156/00**

**56/85**

**81/12**

**63/01**

**37/73**

**39/52**

**35/60**

**60/18**

**28/63**

**99/12**

**178/96**

**75/00**

**127/99**

**35/58**

7/14  
81/22  
84/42  
33/68  
57/74  
44/15  
17/74  
35/18  
77/21

20/80

61/64  
19/16  
17/98  
77/65  
29/74  
75/70

26/35

65/71  
36/09  
110/76  
15/00  
21/00  
40/44  
27/90  
50/58  
21/38  
26/08  
15/02  
48/89  
51/20

51/80

35/50  
73/67

21/86  
47/75  
24/28



**49/89**

**23/05**

**120/67**

**72/31**

**107/16**

**41/02**

**41/62**

**47/53**

**50/51**

**36/93**

**56/06**

**32/90**

**28/22**

**43/96**

**104/28**



2/00

2/00

2/00

2/00

2/00

2/00

2/00

2/00

2/00

2/00

3/00

3/00

3/00

3/00

3/00

3/00

3/00

3/00

3/00

3/00

3/00

3/00

3/00

3/00

3/00

3/00

3/00

3/00

3/00

3/00

3/00

3/00

3/00

3/00

3/00

3/00

3/00

3/00

4/00

4/00

4/00

4/00

4/00

4/00

4/00

4/00

4/00



| MAX S | Microcycle |
|-------|------------|
| 32/75 | 1/00       |
|       | 1/00       |
|       | 1/00       |
|       | 1/00       |
|       | 1/00       |
|       | 1/00       |
|       | 1/00       |
| 30/08 | 1/00       |
| 34/60 | 1/00       |
|       | 1/00       |
| 26/35 | 1/00       |
|       | 1/00       |
| 26/90 | 1/00       |
|       | 1/00       |
|       | 1/00       |
| 29/58 | 1/00       |
|       | 1/00       |
| 32/60 | 1/00       |
|       | 1/00       |
| 21/51 | 1/00       |
| 27/02 | 1/00       |
|       | 1/00       |
| 29/02 | 1/00       |
|       | 1/00       |
|       | 1/00       |
|       | 1/00       |
| 30/90 | 1/00       |
|       | 1/00       |
| 27/44 | 2/00       |
|       | 2/00       |
|       | 2/00       |
|       | 2/00       |
| 28/29 | 2/00       |
| 26/87 | 2/00       |
| 27/14 | 2/00       |
| 26/98 | 2/00       |
| 26/18 | 2/00       |
| 28/19 | 2/00       |
|       | 2/00       |
| 26/78 | 2/00       |
| 29/61 | 2/00       |
|       | 2/00       |
| 30/37 | 2/00       |
| 29/60 | 2/00       |
| 30/05 | 2/00       |
| 26/72 | 2/00       |

| M1    |
|-------|
| 29/21 |
| 3/67  |

heet1)  
1419

Mean  
44/27273  
42/86364  
29/19048  
38/42857

Krusl  
Krusl

- 1
- 2
- 3
- 4

|              |      |
|--------------|------|
| <b>24/94</b> | 2/00 |
| <b>28/05</b> | 2/00 |
| <b>28/71</b> | 2/00 |
| <b>27/71</b> | 2/00 |
| <b>27/42</b> | 2/00 |
| <b>27/88</b> | 2/00 |
| <b>26/11</b> | 2/00 |
| <b>25/93</b> | 2/00 |
| <b>29/03</b> | 2/00 |
|              | 2/00 |
| <b>26/69</b> | 3/00 |
|              | 3/00 |
|              | 3/00 |
|              | 3/00 |
| <b>27/24</b> | 3/00 |
| <b>27/06</b> | 3/00 |
| <b>26/48</b> | 3/00 |
| <b>28/37</b> | 3/00 |
| <b>26/24</b> | 3/00 |
| <b>28/06</b> | 3/00 |
|              | 3/00 |
| <b>26/32</b> | 3/00 |
|              | 3/00 |
|              | 3/00 |
| <b>27/44</b> | 3/00 |
| <b>26/51</b> | 3/00 |
| <b>29/15</b> | 3/00 |
| <b>26/00</b> | 3/00 |
| <b>25/56</b> | 3/00 |
| <b>26/16</b> | 3/00 |
| <b>26/47</b> | 3/00 |
| <b>28/94</b> | 3/00 |
| <b>26/48</b> | 3/00 |
| <b>27/36</b> | 3/00 |
| <b>25/15</b> | 3/00 |
| <b>27/12</b> | 3/00 |
| <b>28/64</b> | 3/00 |
|              | 3/00 |
| <b>28/53</b> | 4/00 |
|              | 4/00 |
|              | 4/00 |
| <b>26/90</b> | 4/00 |
| <b>31/60</b> | 4/00 |
|              | 4/00 |
| <b>26/70</b> | 4/00 |
| <b>24/12</b> | 4/00 |
| <b>25/21</b> | 4/00 |

|              |      |
|--------------|------|
| <b>28/31</b> | 4/00 |
|              | 4/00 |
| <b>25/80</b> | 4/00 |
|              | 4/00 |
|              | 4/00 |
| <b>29/34</b> | 4/00 |
| <b>28/02</b> | 4/00 |
| <b>29/72</b> | 4/00 |
| <b>27/12</b> | 4/00 |
| <b>26/74</b> | 4/00 |
| <b>27/31</b> | 4/00 |
| <b>27/55</b> | 4/00 |
| <b>26/97</b> | 4/00 |
| <b>27/69</b> | 4/00 |
| <b>27/41</b> | 4/00 |
| <b>26/64</b> | 4/00 |
| <b>26/06</b> | 4/00 |
| <b>29/49</b> | 4/00 |
|              | 4/00 |

| M2    | M3    | M4    |
|-------|-------|-------|
| 27/73 | 27/02 | 27/49 |
| 1/42  | 1/09  | 1/67  |

Kal-Wallis ANOVA by Ranks; Var1 (Spreadsheet1)

Independent (grouping) variable: Var2

Kal-Wallis test:  $H(3, N=75) = 7,584835$   $p = ,0554$

| Code | Valid | Sum of   | Mean     |
|------|-------|----------|----------|
| 1    | 11    | 563/0000 | 51/18182 |
| 2    | 22    | 894/0000 | 40/63636 |
| 3    | 21    | 620/0000 | 29/52381 |
| 4    | 21    | 773/0000 | 36/80952 |
